# Supplementary material for: Dose-Dependent Effects of Insulin-Like Growth Factor 1 in the Aged Olfactory Epithelium
Source: Front Aging Neurosci. 2018 Nov 20;10:385. doi: 10.3389/fnagi.2018.00385 (PMC6256067; doi:10.3389/fnagi.2018.00385)
Supplement: TABLE S1 — Change rate of each cell number. Each change rate was calculated by dividing each cell number in the low and high-dose insulin-like growth factor-1 (IGF-1) groups by those in the saline-treated control group. ∗P < 0.05; ∗∗P < 0.01; and ∗∗∗∗P < 0.0001 (one-way ANOVA). Cas3, caspase-3; GAP43, growth associated protein 43; OMP, olfactory marker protein; ORN, olfactory receptor neuron; SOX2, sex determining region Y-box 2. [file Table_1.XLSX]

## Sheet: Sheet1
		Low-IGF-1	High IGF-1
	OMP+ cells	125.7%＊	1.025
	SOX2+ cells	127.1%＊	1.077
	GAP43+ cells	173.6%**	150.5%*
	Ki67+ cells	214.9%*	203%*
	Cas3+ cells	193.8%*	354.7%****
